# Supplementary material for: Fatal attraction of Caenorhabditis elegans to predatory fungi through 6-methyl-salicylic acid
Source: PubMed Central journal article supplement (PMC8443565; doi:10.1038/s41467-021-25535-1), 2021-09-15
Supplement: 41467_2021_25535_MOESM1_ESM.pdf [file 41467_2021_25535_MOESM1_ESM.pdf]

## Supplementary Information

### Fatal attraction of *Caenorhabditis elegans* to predatory fungi through 6-methyl-salicylic acid

Xi Yu<sup>1,4</sup>, Xiaodi Hu<sup>1</sup>, Maria Mirza<sup>1</sup>, Nicole Wernet<sup>1</sup>, Frank Kirschhöfer<sup>2</sup>, Gerald Brenner-Weiß<sup>2</sup>, Julia Keller<sup>3</sup>, Mirko Bunzel<sup>3</sup> and Reinhard Fischer<sup>1\*</sup>

**running head:** Methyl salicylate as morphogen and quorum sensing molecule in *D. flagrans*

**Address:** <sup>1</sup>Karlsruhe Institute of Technology (KIT) - South Campus  
Institute of Applied Biosciences  
Dept. of Microbiology  
Fritz-Haber-Weg 4  
D-76131 Karlsruhe, Germany  
Phone: +49-721-6084-4630  
E-mail: [reinhard.fischer@KIT.edu](mailto:reinhard.fischer@KIT.edu)  
Homepage: [www.iab.kit.edu](http://www.iab.kit.edu)

<sup>2</sup>Karlsruhe Institute of Technology (KIT) - North Campus  
Institute of Functional Interfaces  
Bioengineering and Biosystems  
Hermann-von-Helmholtz-Platz 1  
D-76344 Eggenstein Leopoldshafen

<sup>3</sup>Karlsruhe Institute of Technology (KIT) - South Campus  
Institute of Applied Biosciences  
Dept. of Food Chemistry and Phytochemistry  
Adenauerring 20A  
D-76131 Karlsruhe

<sup>4</sup>present address:  
Shanghai Engineering Research Centre of Hadal Science and  
Technology, College of Marine Sciences, Shanghai Ocean  
University  
Huchenghuan Road 999  
201306, Shanghai, China

\* corresponding author

## Suppl. Figures

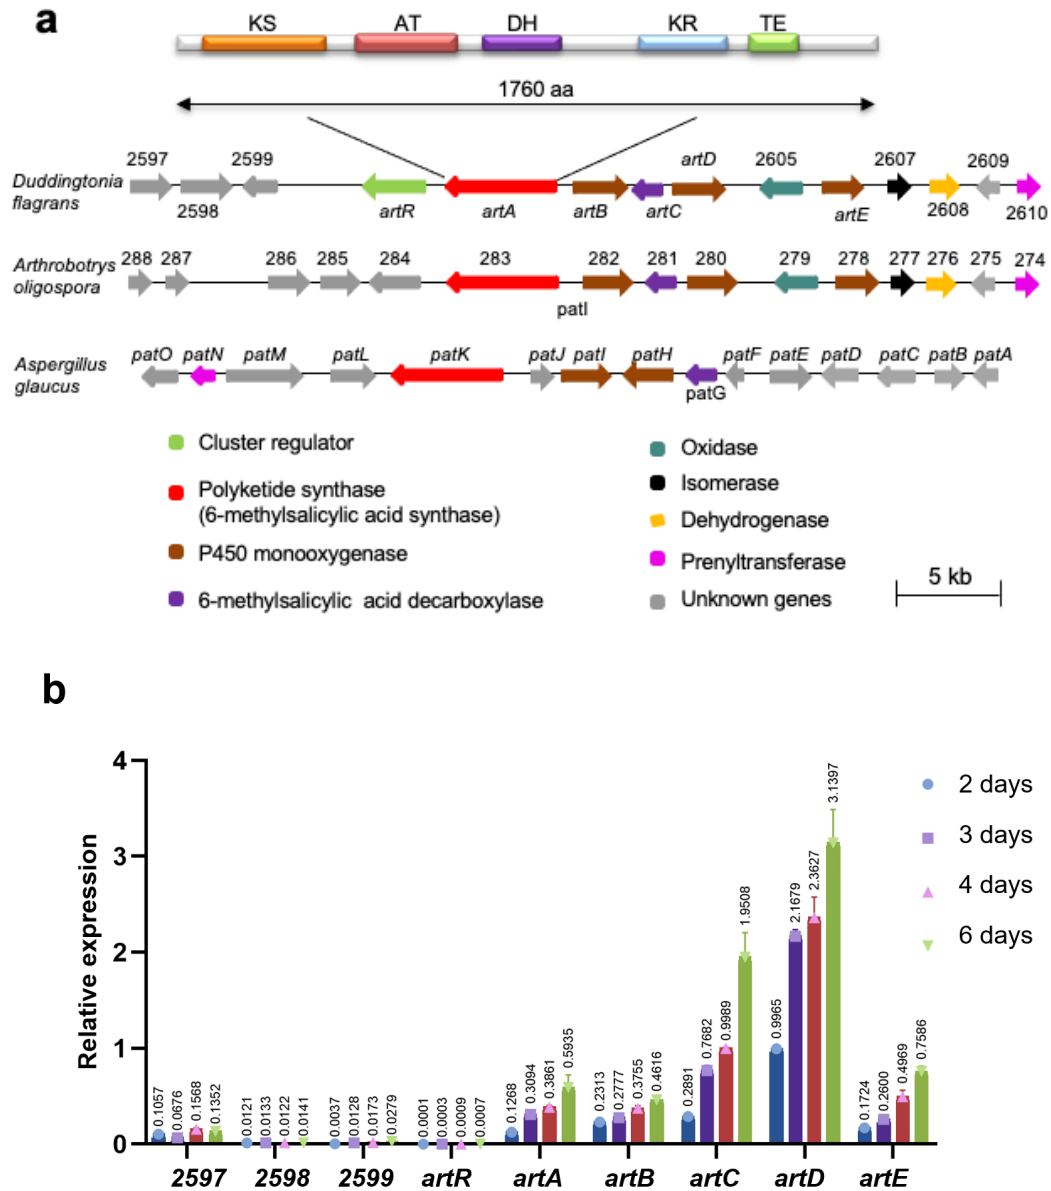

**Suppl. Fig. S1: Characterization of the *artA*-gene cluster. (a)** Bioinformatic analysis and comparison with the corresponding clusters in *Arthrospora oligospora* and the patulin gene cluster of *Aspergillus glaucus*. The *artA* gene (DFL\_002601) is 5363 bp in length and encodes a 1760-amino acid long protein. It contains five typical catalytic domains, including a Keto Synthase (KS), an acyltransferase (AT), a dehydratase (DH), a  $\beta$ -ketoacylreductase domain (KR), and an acyl carrier protein (ACP) for the PKS. **(b)** Expression analysis of several genes indicated in (a). RNA was extracted after two, three, four and six days and analyzed by quantitative real time RT PCR. Data are presented as mean values  $\pm$  SD,  $n = 3$  biological with 3 technical replicates. Source data are provided as a Source Data file.

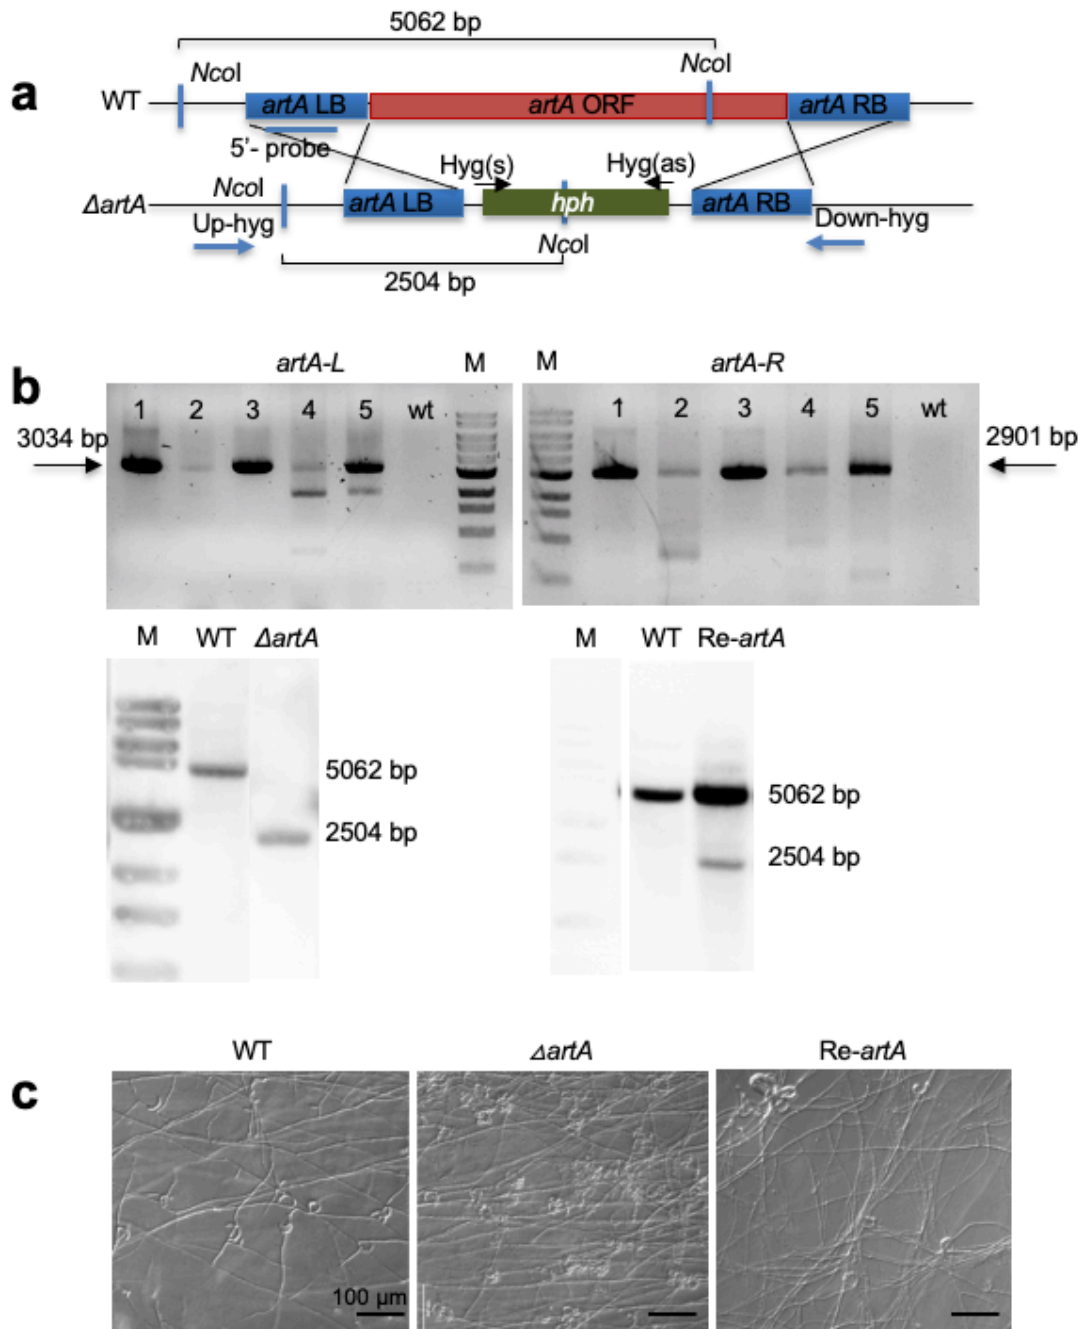

**Suppl. Fig. S2:** (a) Scheme of the deletion strategy for *artA*. (b) (upper panels) PCR analysis of WT and five independent transformants. The left part (*artA-L*) was amplified with the Up-hyg and Hyg(as), and the right part (*artA-R*) with Hyg(s) and Down-hyg. (lower panels) Southern blot analysis of the WT and  $\Delta artA$ -deletion strain (SXY05) and a re-complemented strain (SXD05). Genomic DNA was digested and hybridized as indicated in (a). (c) Overview of traps formed in colonies on agar plates (9 cm diameter) of the strains described in (b). Scale bar, 100  $\mu$ m. Source data are provided as a Source Data file.

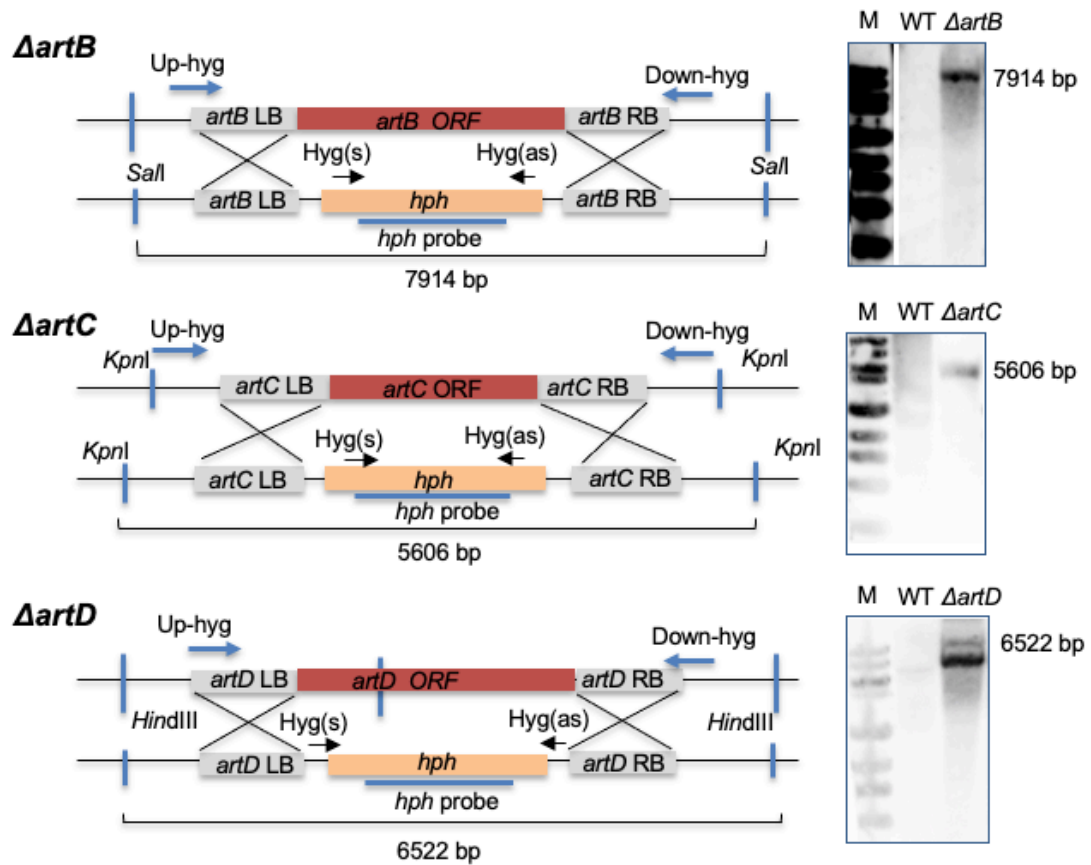

**Suppl. Fig. S3:** Schemes for the deletion of *artB-D* and results of the Southern hybridization using the *hph* gene as probe. Strains were SXY15 ( $\Delta artB$ ), SXY14 ( $\Delta artC$ ) and SXY16 ( $\Delta artD$ ). Source data are provided as a Source Data file.

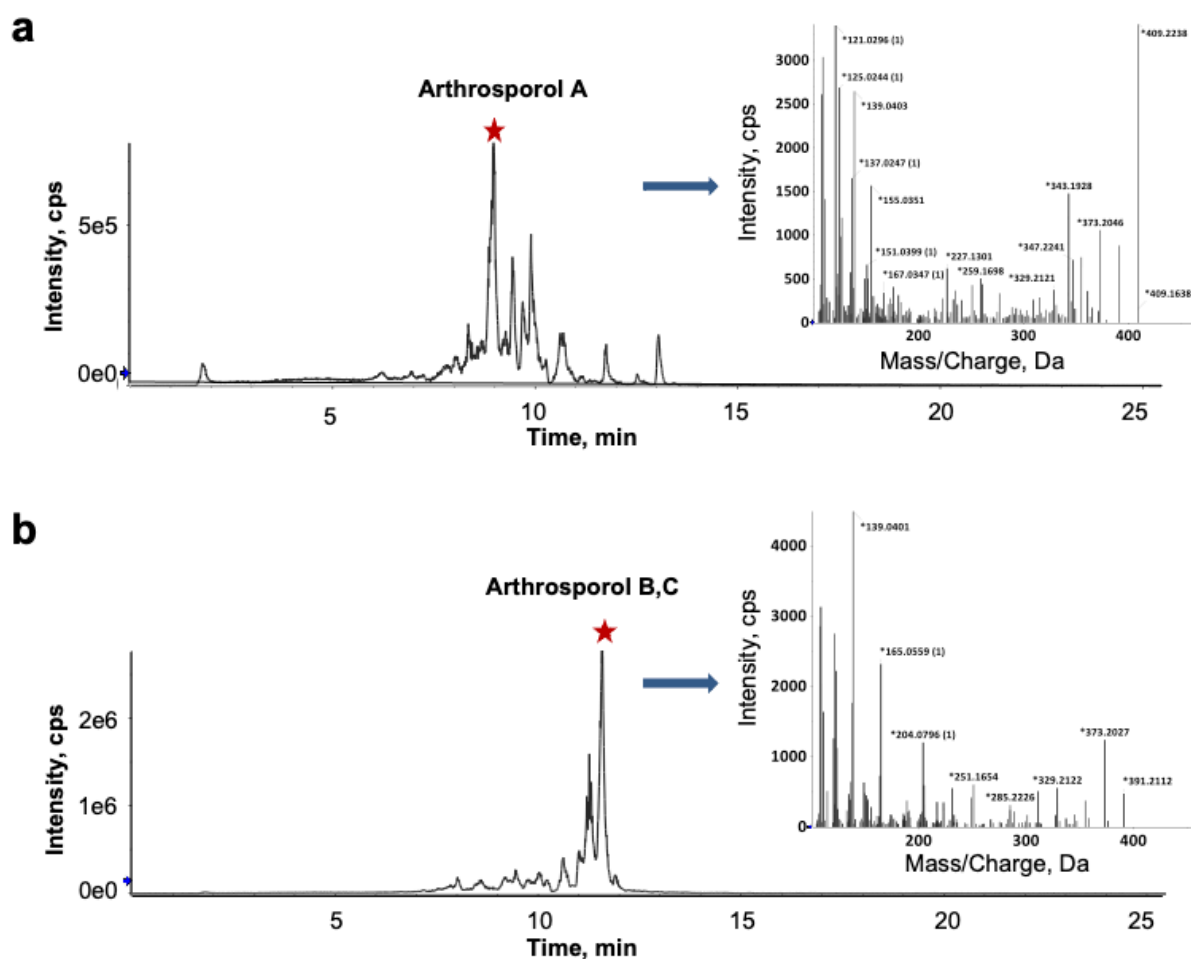

**Suppl. Fig. S4:** (a) LC-MS/MS characterization of arthrosporal A of the culture broths of wild type and the  $\Delta artA$ -deletion strain. IDA TOF MS (100-1000) from 6.821 min, 409.223  $\pm$  0.005 Da, noise filtered (noise multiplier=1.5), Gaussian smoothed (0.5 points). (b) Quantitative product ion; IDA TOF MSMS (70-1000) from 6.825 min. Precursor 409.2 Da, +1, noise filtered (noise multiplier=1.5), Gaussian smoothed (0.5 points). Quantitative and Qualitative ions m/z MS/MS of 409.223, 139.1, 155.0, 391.4. Source data are provided as a Source Data file.

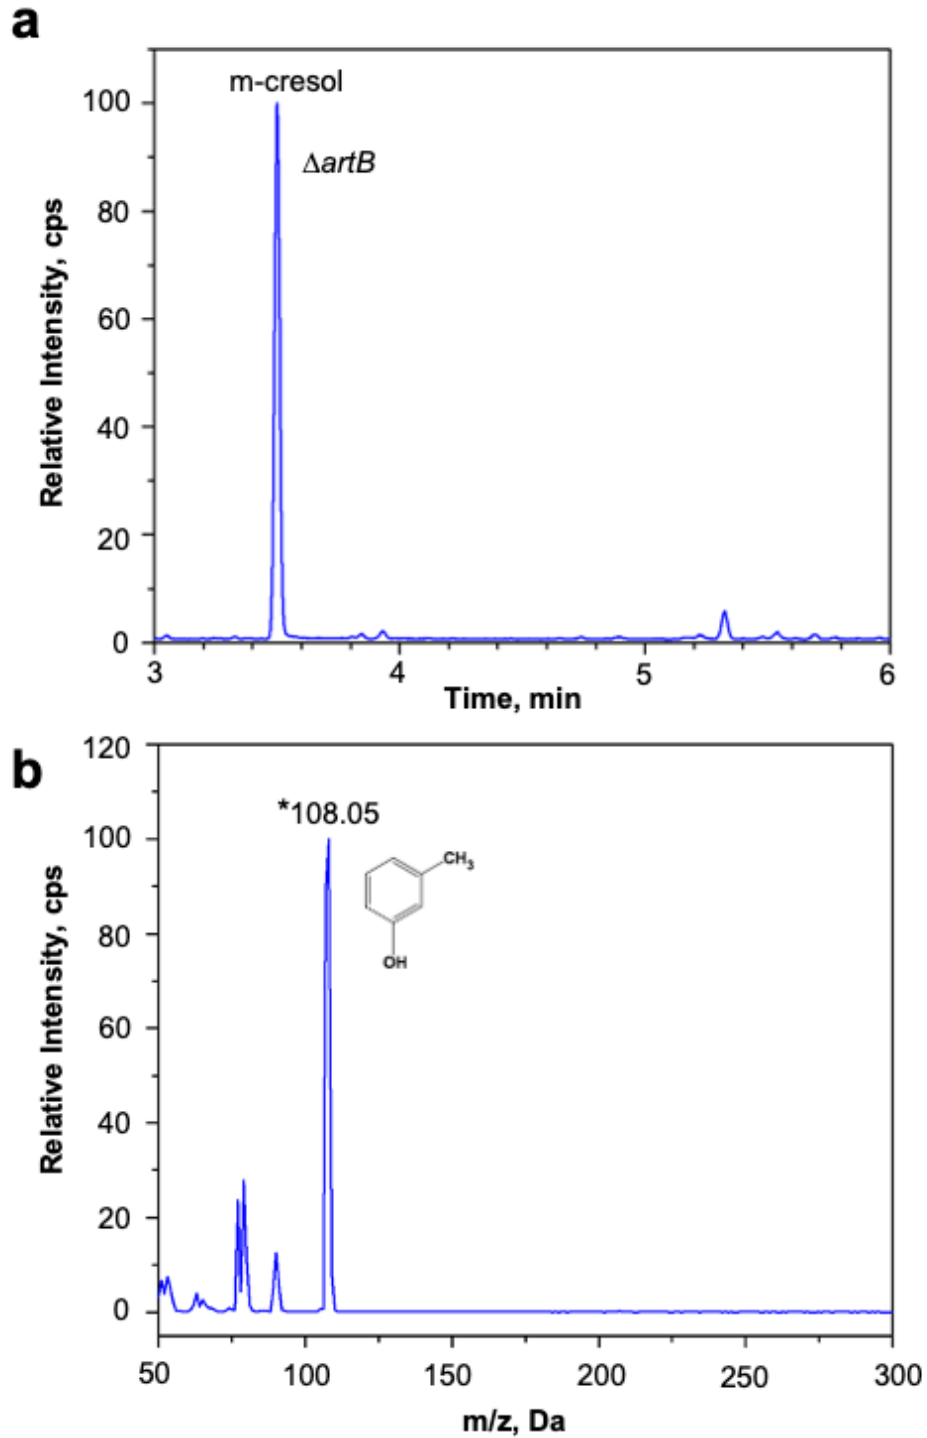

**Suppl. Fig. S5:** (a) GC-MS/MS characterization of m-cresol of the cultural broths of the  $\Delta artB$ -deletion strain. Retention time of m-cresol: 3.5 min. (b) MS spectrum of the cultural broth of  $\Delta artB$  for m-cresol: Raw spectrum, 3.470 -> 3.542 (scan: 283 -> 326); base peak, m/z 108.05 (Inten: 2,106,625). Source data are provided as a Source Data file.

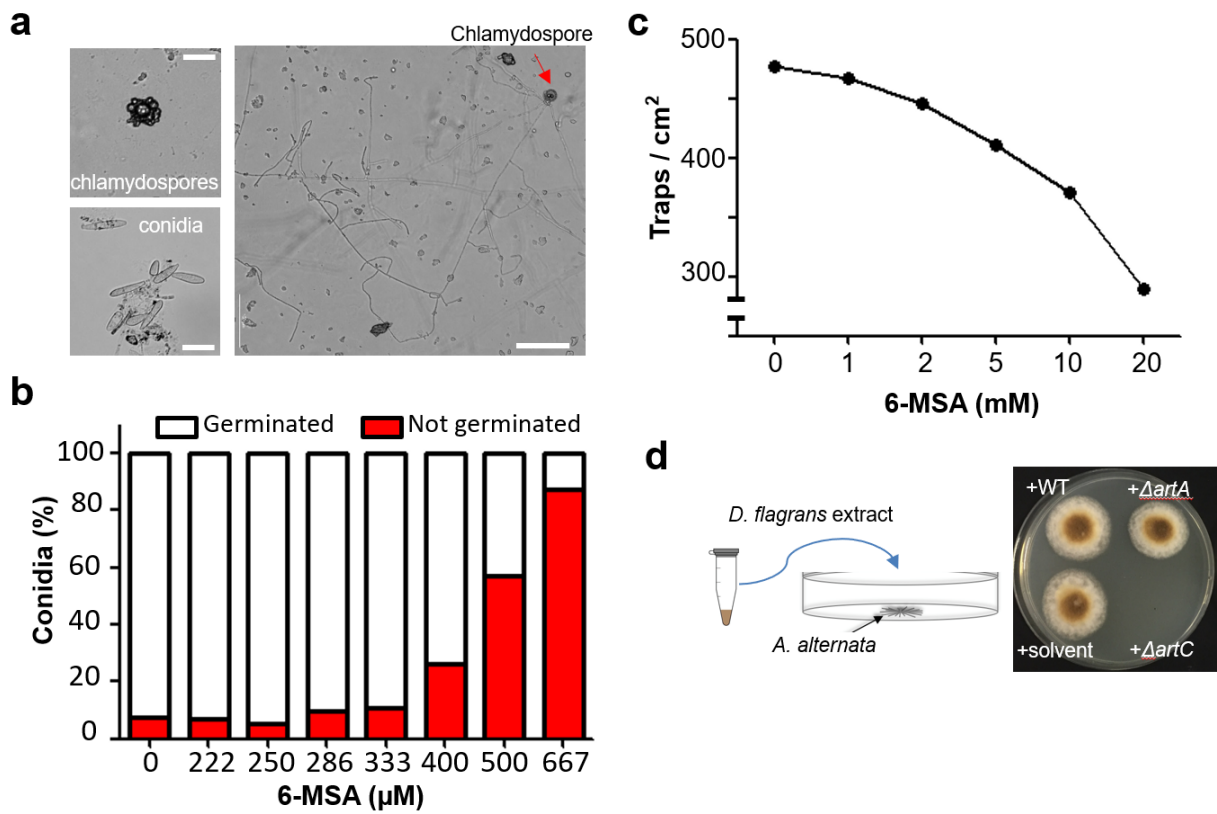

**Suppl. Fig. S6:** (a) Incubation of chlamydospores and conidia in the presence of 10  $\mu\text{l}$  (undiluted)(left, Scale bar, 20  $\mu\text{m}$ ) and 10  $\mu\text{l}$  (diluted 1:10 with the solvent) (right, Scale bar, 100  $\mu\text{m}$ ) extract. (b) Germination of spores was determined at different concentrations of 6-MSA. (c) Quantification of the number of traps a different 6-MSA concentrations. (d) Effect of *D. flagrans* extracts of cultural broth from WT and the  $\Delta artA$  and  $\Delta artC$  mutants on colony growth of *Alternaria alternata*. Source data are provided as a Source Data file.

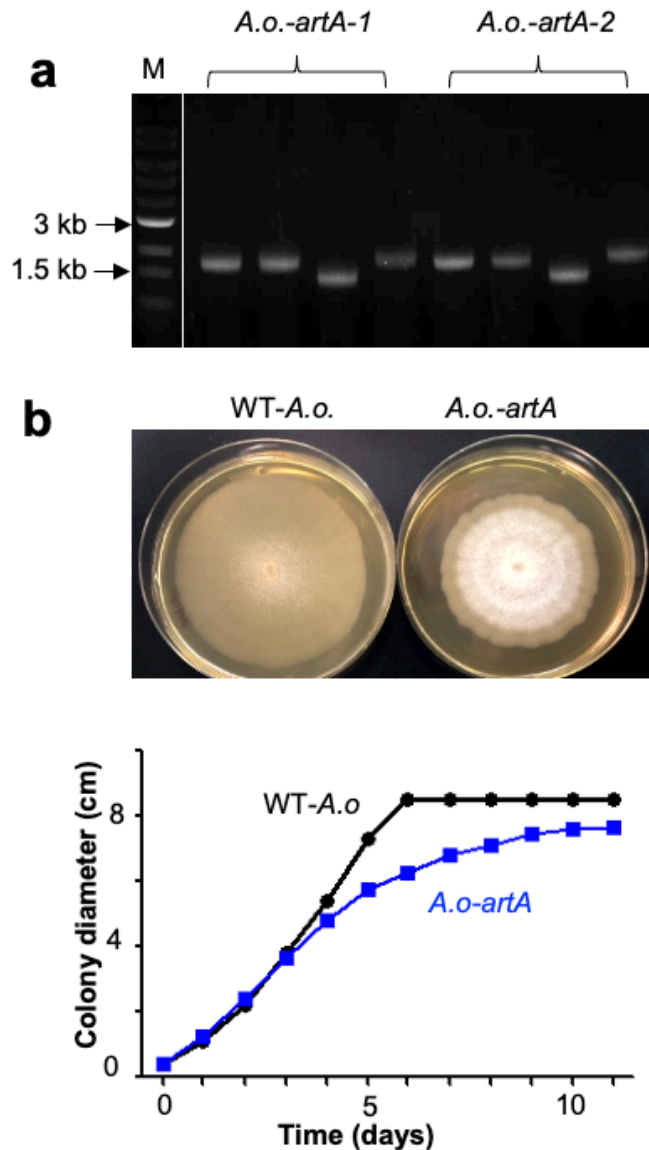

**Suppl. Fig. S7: Heterologous expression of *artA* in *A. oryzae*.** (a) (left) PCR analysis of different transformants. Left lane: Two transformants *artA-1* and *artA-2* and WT were chosen for further analysis. Four fragments were amplified with primers *pksA\_Ao\_transform\_for* and *pksA\_AO\_tf\_up\_rev* (1639 bp), *pksA\_AO\_tf\_up\_for* and *PksA\_recomp\_mid\_rev* (1623 bp), *PksA\_recomp\_mid\_for* and *pksA\_AO\_tf\_down\_rev* (1343 bp), *pksA\_AO\_tf\_down\_for* and *pksA\_Ao\_PCRconfirm\_rev* (1719 bp). (right) Two colonies of WT and the *artA*-expressing strain (SXD01) after 11 days of growth on PDA medium. (b) Quantification of fungal growth by measuring the colony diameter. Source data are provided as a Source Data file.



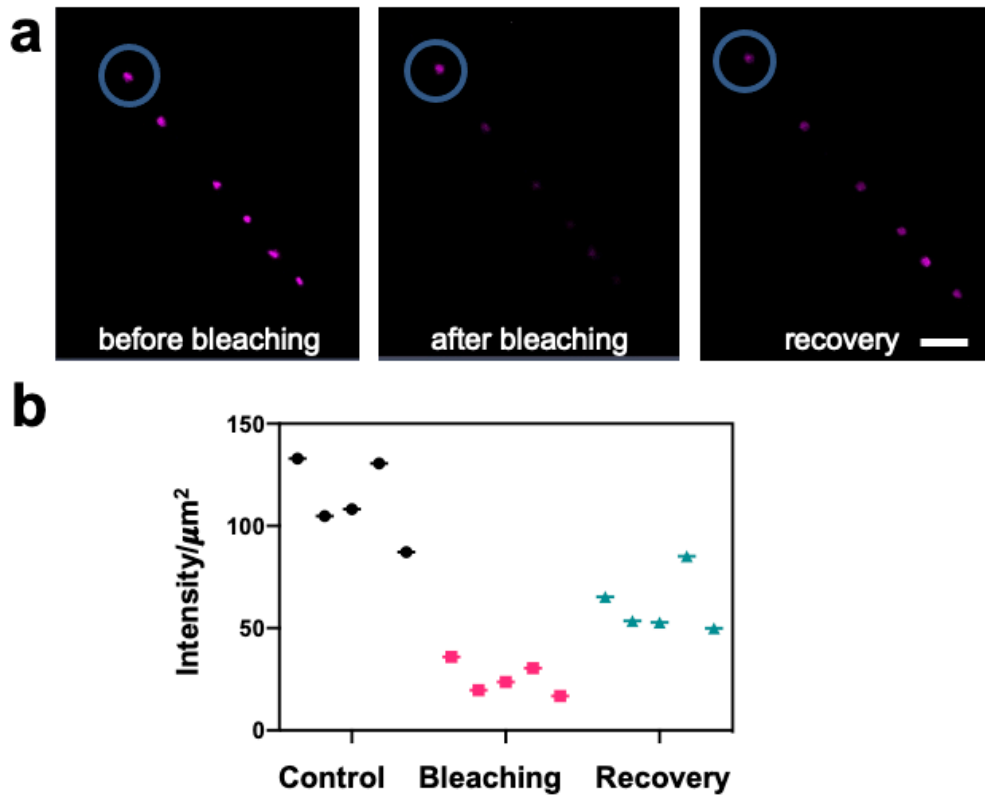

**Suppl. Fig. S8: Promoter activity of *artA* in *D. flagrans*.** The promoter of *artA* was fused to *h2b* and *mCherry* (strain SXY17). **(a)** Fluorescence recovery after photobleaching (FRAP). The sample was bleached for 5 seconds and recovered for 14 minutes. (Scale bar, 10  $\mu\text{m}$ ) **(b)** Quantification of CTCF intensity value of 5 different nuclei (left) after bleaching 5 s and recovery for 14 min. Scale bar, 20  $\mu\text{m}$ . Source data are provided as a Source Data file.

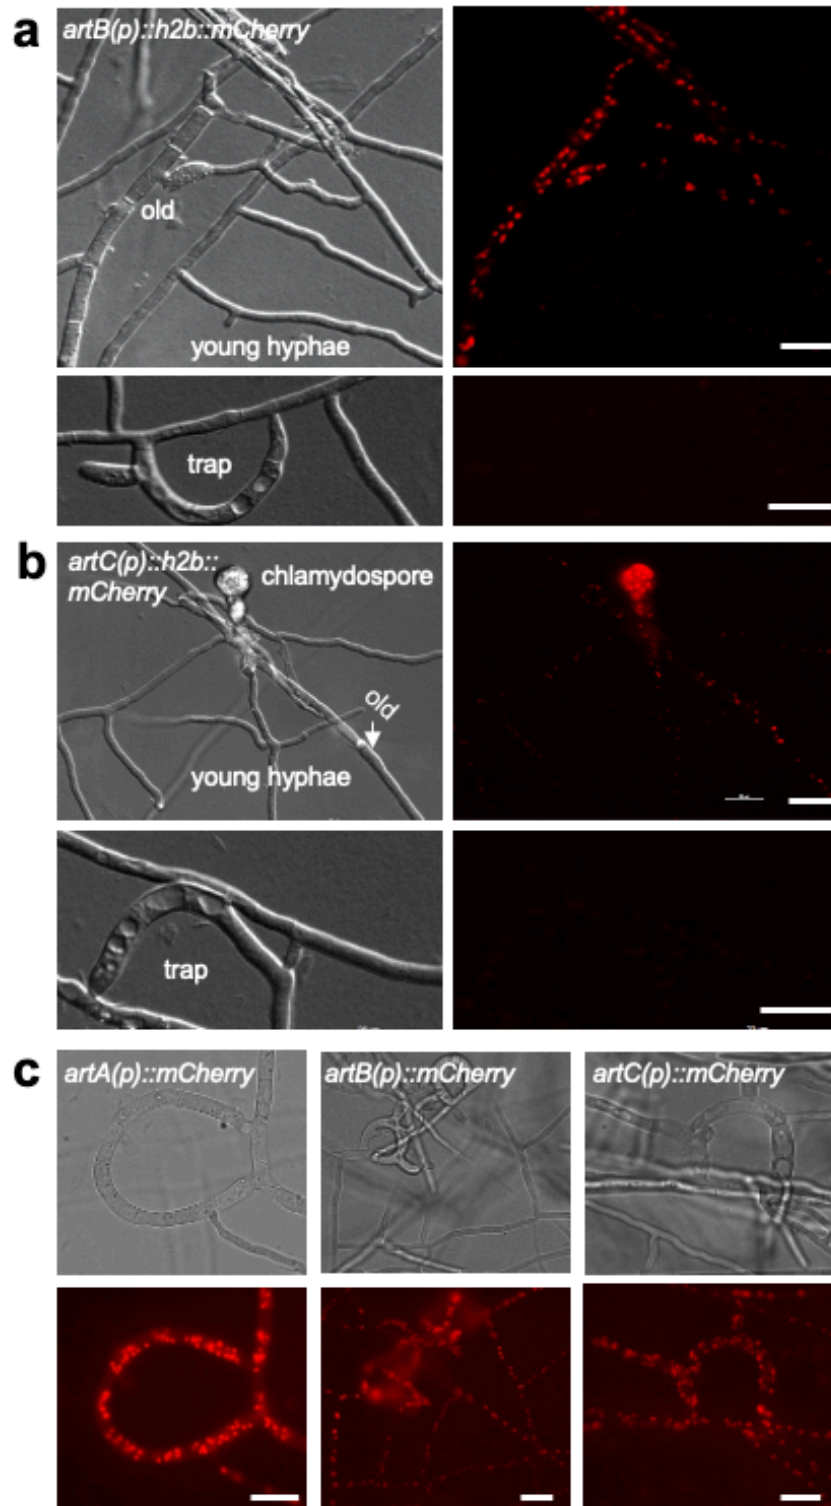

**Suppl. Fig. S9: Expression analysis of *artA-C*.** (a) Expression analysis of *artB* (strain SXY20). (b) Expression analysis of *artC* (strain SXY19). (c) Analysis of *artA-C* expression in old traps. Scale bar, 20  $\mu\text{m}$ .

**Suppl. Table S1: *D. flagrans* and *A. oryzae* strains used in this study.**

| <b>Strain</b>                            | <b>Genotype</b>                                                                                           | <b>Reference</b>                     |
|------------------------------------------|-----------------------------------------------------------------------------------------------------------|--------------------------------------|
| <b><i>D. flagrans</i><br/>CBS 349.94</b> | wild type (WT)                                                                                            | CBS-KNAW culture collection          |
| <b>SXY05</b>                             | WT transformed with PXY09, $\Delta artA::hyg$                                                             | This work                            |
| <b>SXY14</b>                             | WT transformed with PXY15, $\Delta artC::hyg$ ,                                                           | This work                            |
| <b>SXY15</b>                             | WT transformed with PXY16, $\Delta artB::hyg$                                                             | This work                            |
| <b>SXY16</b>                             | WT transformed with PXY17, $\Delta artD::hyg$                                                             | This work                            |
| <b>SXY17</b>                             | WT transformed with PXY18, hyg,<br>expression of <i>artA</i>                                              | This work                            |
| <b>SXY20</b>                             | WT transformed with PXY21, hyg,<br>expression of <i>artB</i>                                              | This work                            |
| <b>SXY19</b>                             | WT transformed with PXY20, hyg,<br>expression of <i>artC</i>                                              | This work                            |
| <b>SXD05<br/><i>Re-artA</i></b>          | <i>artA</i> re-complementation;<br>transformed with pXD6                                                  | SXY05 This work                      |
| <b>SXD53</b>                             | Co-localization of ArtA-GFP and ArtB-<br>mCherry <i>in locus</i> , WT transformed with<br>pXD88 and pXD89 |                                      |
| <b><i>A. oryzae</i> Wild type</b>        | Wild type                                                                                                 | Russel J. Cox,<br>Leibniz University |
| <b>SXD01<br/><i>A.o-artA</i></b>         | Heterologous expression of <i>artA</i> in<br>WT, with pXD1                                                | This work                            |

**Suppl. Table S2: Plasmids used in this study.**

| <b>Name</b>    | <b>Description</b>                                                                                      | <b>Reference</b> |
|----------------|---------------------------------------------------------------------------------------------------------|------------------|
| <b>pJET1.2</b> | ampR                                                                                                    | Thermo Fisher    |
| <b>pXY09</b>   | <i>artA(l)::trpC(p)::hph::trpC(t):: artA(r); ampR;</i><br>plasmid for the deletion of <i>artA</i>       | This work        |
| <b>pXY15</b>   | <i>artC(l)::trpC(p)::hph::trpC(t):: artC(r); ampR;</i><br>plasmid for the deletion of <i>artC</i>       | This work        |
| <b>pXY16</b>   | <i>artB(l)::trpC(p)::hph::trpC(t):: artB(r); ampR</i><br>plasmid for the deletion of <i>artB</i>        | This work        |
| <b>pXY17</b>   | <i>artD(l)::trpC(p)::hph::trpC(t):: artD(r); ampR</i><br>plasmid for the deletion of <i>artD</i>        | This work        |
| <b>pXY18</b>   | <i>artA(p)::h2b::mCherry::TubT;</i><br>expression of <i>artA</i>                                        | This work        |
| <b>pXY21</b>   | <i>artB(p)::h2b::mCherry::TubT</i><br>expression of <i>artB</i>                                         | This work        |
| <b>pXY20</b>   | <i>artC(p)::h2b::mCherry::TubT</i><br>expression of <i>artC</i>                                         | This work        |
| <b>pXD6</b>    | <i>pksA(p)::artA::artA(t); ampR; adeA</i><br><i>artA</i> re-complementation                             | This work        |
| <b>pXD1</b>    | <i>amyB(p)::pksA::amyB(T); ampR; adeA</i><br>Heterologous expression of <i>artA</i> in <i>A. oryzae</i> | This work        |
| <b>pNH30</b>   | <i>gpdA(p)::mCherry::TubT</i>                                                                           | 1                |
| <b>pXD88</b>   | <i>artA::GFP::trpC(p)::hph::trpC(t)::artA(t)</i>                                                        | This work        |
| <b>pXD89</b>   | <i>artB::mCherry::trpC(p)::hph::trpC(t)::artB(t)</i>                                                    | This work        |

**Suppl. Table S3: Oligonucleotides used in this study.**

| <b>Name</b>                  | <b>Sequence (from 5' to 3')</b>                      | <b>Description</b>            |
|------------------------------|------------------------------------------------------|-------------------------------|
| <b><i>artA</i> olup_fw</b>   | CCGGATGGCTCGAGTTTTTCAGCAAGA<br>TACATCCAATCCCCCCTAAC  | <i>artA</i> -knockout-plasmid |
| <b><i>artA</i> olup_rev</b>  | TCCACTAGCATTACACTTGGATCCcgAT<br>CCCACCCATCCCAATTC    | <i>artA</i> -knockout-plasmid |
| <b>hygolup_fw</b>            | GGATCCAAGTGTAATGCTAGTGGA                             | <i>artA</i> -knockout-plasmid |
| <b>hygolup_rev</b>           | CTGCAGTGGGGGGAGTTTAGGGAAA                            | <i>artA</i> -knockout-plasmid |
| <b><i>artA</i>oldown_fw</b>  | TTTCCCTAAACTCCCCCACTGCAGaa<br>GCCAAAGAAGTCAAGTCAAAAG | <i>artA</i> -knockout-plasmid |
| <b><i>artA</i>oldown_rev</b> | TATTGTAGGAGATCTTCTAGAAAGATAC<br>ATAACCGAACACCAAACAG  | <i>artA</i> -knockout-plasmid |
| <b><i>artB</i>olup_fw</b>    | TGGCTCGAGTTTTTCAGCAAGATGTGG<br>GCGAATAAGAATGAAAAG    | <i>artB</i> -knockout-plasmid |
| <b><i>artB</i>olup_rev</b>   | TCCACTAGCATTACACTTGGATCCcgGA<br>GCAAAGCGGAAACATAAAAG | <i>artB</i> -knockout-plasmid |
| <b><i>artB</i>oldown_fw</b>  | TTTCCCTAAACTCCCCCACTGCAGaaA<br>AGGAATACACGGGGCAAG    | <i>artB</i> -knockout-plasmid |
| <b><i>artB</i>oldown_rev</b> | TATTGTAGGAGATCTTCTAGAAAGATTA<br>CACGAACAGCGATGGAC    | <i>artB</i> -knockout-plasmid |
| <b><i>artC</i>olup_fw</b>    | TGGCTCGAGTTTTTCAGCAAGATCTCG<br>AACCCAAGCGGTAGAG      | <i>artC</i> -knockout-plasmid |
| <b><i>artC</i>olup_rev</b>   | CCTCCACTAGCATTACACTTCGGATTT<br>GGGGCACAGTCTT         | <i>artC</i> -knockout-plasmid |
| <b><i>artC</i>oldown_fw</b>  | TCTTTCCCTAAACTCCCCCATTCCGTT<br>CCGATCGACTTCGT        | <i>artC</i> -knockout-plasmid |
| <b><i>artC</i>oldown_rev</b> | TATTGTAGGAGATCTTCTAGAAAGATTG<br>ACTTTGCGGCTCTTCCA    | <i>artC</i> -knockout-plasmid |
| <b><i>artD</i>olup_fw</b>    | GATGGCTCGAGTTTTTCAGCAAGATTA                          | <i>artD</i> -knockout-plasmid |

|                         |                                                      |                                |
|-------------------------|------------------------------------------------------|--------------------------------|
|                         | CAAAGACAACGGCGGAG                                    |                                |
| <b>artDolup_rev</b>     | CTCCACTAGCATTACACTTGGATCCcgC<br>CCCAAAGGTAACAAGAGAAG | <i>artD</i> -knockout-plasmid  |
| <b>artDoldown_fw</b>    | TTCCCTAAACTCCCCCACTGCAGaa<br>CGCCCCCTTAGTCTATTTTT    | <i>artD</i> -knockout-plasmid  |
| <b>artDoldown_rev</b>   | GTAGGAGATCTTCTAGAAAGATTCTTG<br>CTCTCCTTTTTCTGTC      | <i>artD</i> -knockout-plasmid  |
| <b>H2b-FW</b>           | GAAGAAGGCAGGAAAGAAGAC                                | House-keeping gene             |
| <b>H2b-Rev</b>          | TTGGCAGACGAGGAAGAG                                   | real-time PCR                  |
| <b>2597-Fw</b>          | CTGTCATCAACACCCTGAACC                                | 2597 real-time PCR             |
| <b>2597-Rev</b>         | TCGCTTCTCTCGCTCTATCC                                 | 2597 real-time PCR             |
| <b>2598-Fw</b>          | GACCCCGCTACATTGGAAAC                                 | 2598 real-time PCR             |
| <b>2598-Rev</b>         | TACCCTTCACTCCCTCCTCTAC                               | 2598 real-time PCR             |
| <b>2599-Fw</b>          | CAACCATACCTCCTCCAACCTC                               | 2599 real-time PCR             |
| <b>2599-Rev</b>         | ACTTCCATCGCTCTGACCTG                                 | 2599 real-time PCR             |
| <b>artA-fw</b>          | AACATCTCATCTCCCTCACC                                 | <i>artA</i> real-time PCR      |
| <b>artA-Rev</b>         | AACTCCCATCAGTCAAGCC                                  | <i>artA</i> real-time PCR      |
| <b>artB-FW</b>          | GACCCCAAGATTGAAAGAGCC                                | <i>artB</i> real-time PCR      |
| <b>artB-Rev</b>         | CTACCACCTTCCAACCTGAACAC                              | <i>artB</i> real-time PCR      |
| <b>artC -fw</b>         | GTCGTTCTACTTCGATCTCG                                 | <i>artC</i> real-time PCR      |
| <b>artC -fw</b>         | GTACTCTATAACCCTTTGTCG                                | <i>artC</i> real-time PCR      |
| <b>artD-Fw</b>          | CGAAACTACTTGATGAGCCTCC                               | <i>artD</i> real-time PCR      |
| <b>artD-Rev</b>         | TCCGCTTTGCCACTTGTTTAC                                | <i>artD</i> real-time PCR      |
| <b>2605-Fw</b>          | GTTCTCCAGACCAAGTTCAGC                                | 2605 real-time PCR             |
| <b>2605-Rev</b>         | TCCCCATCTATTTCCACACC                                 | 2605 real-time PCR             |
| <b>artE-FW</b>          | CGATGATCCCGAAGCACAAG                                 | <i>artE</i> real-time PCR      |
| <b>artE-REV</b>         | CGCAAGAAGGAAGATGGCAC                                 | <i>artE</i> real-time PCR      |
| <b>pjetBB_rekom_rev</b> | ATCTTGCTGAAAACTCGAGC                                 | <i>artA</i> re-complementation |
| <b>trpcP_for</b>        | AAGTGTAATGCTAGTGGAGGT                                | <i>artA</i> re-complementation |

|                           |                                                   |                                                  |
|---------------------------|---------------------------------------------------|--------------------------------------------------|
| <b>PksA_LB_recomp_for</b> | GATGGCTCGAGTTTTTCAGCAAGATTC<br>TCATGACAAGGTTGCGCT | <i>artA</i> re-complementation                   |
| <b>PksA_recomp_rev</b>    | CGCTCTCGGAAAACACTACT                              | <i>artA</i> re-complementation                   |
| <b>PksA_recomp_for</b>    | AGTGTAGTTTTCCGAGAGCG                              | <i>artA</i> re-complementation                   |
| <b>PksA_RB_recomp_rev</b> | GTTGACCTCCACTAGCATTACTTAC<br>ATAACCGAACACCAAACAG  | <i>artA</i> re-complementation                   |
| <b>pksA_Ao_for</b>        | AAGAGTCAGTCAGTCTTAATATGACTTC<br>TACGCCAGCGA       | Heterologous expression<br>of <i>artA</i> in A.o |
| <b>PksA_recomp_for</b>    | AGTGTAGTTTTCCGAGAGCG                              | Heterologous expression<br>of <i>artA</i> in A.o |
| <b>PksA_recomp_rev</b>    | CGCTCTCGGAAAACACTACT                              | Heterologous expression<br>of <i>artA</i> in A.o |
| <b>pksA_Ao_rev</b>        | AGATCGACTGACTGACTTTATCAGACC<br>TTCTCTTCAAACCA     | Heterologous expression<br>of <i>artA</i> in A.o |
| <b>artA(p)-h2b-fw</b>     | CTCTTTCCCTAAACTCCCCCACCTCA<br>ACGAACCGCTTACA      | fluorescent signal of <i>artA</i>                |
| <b>artA(p)-h2b-rev</b>    | CGGCGGCTTTTGGTGGCATGGCAGGC<br>CAAAGAAGTCAAG       | fluorescent signal of <i>artA</i>                |
| <b>artC(p)-h2b-fw</b>     | CTCTTTCCCTAAACTCCCCCAAGGCA<br>AAAGTCGTAACCATATC   | fluorescent signal of <i>artC</i>                |
| <b>artC(p)-h2b-rev</b>    | CGGCGGCGGCTTTTGGTGGCATTTTGT<br>GAATTGTTTAAAATTAA  | fluorescent signal of <i>artC</i>                |
| <b>artB(p)-h2b-fw</b>     | CTCTTTCCCTAAACTCCCCCAAAGGA<br>TGAGAGGAAAGCGG      | fluorescent signal of <i>artB</i>                |
| <b>artB(p)-h2b-rev</b>    | GCGGCGGCTTTTGGTGGCATTTTTTGC<br>GCATACAAAAGAGAG    | fluorescent signal of <i>artB</i>                |
| <b>artB(p)-h2b-rev</b>    | GCGGCGGCTTTTGGTGGCATTTTTTGC<br>GCATACAAAAGAGAG    | fluorescent signal of <i>artB</i>                |
| <b>ArtAend_pjet_ol_fo</b> | GGATGGCTCGAGTTTTTCAGCAAGATC                       | ArtA-GFP tag <i>in locus</i>                     |

|                               |                                |                                  |
|-------------------------------|--------------------------------|----------------------------------|
| <b>r</b>                      | CAACGACGATTCAGCTATC            |                                  |
| <b>ArtAend_gfp_ol_rev</b>     | TACTTACCTCACCCCTTGGAACCATGA    | ArtA-GFP tag <i>in locus</i>     |
| <b>v</b>                      | CCTTCTCTTCAAACCATTAA           |                                  |
| <b>Gfp_ArtAend_ol_for</b>     | GGTTAAATGGTTTGAAGAGAAGGTCAT    | ArtA-GFP tag <i>in locus</i>     |
| <b>r</b>                      | GGTTTCCAAGGGTGAGGT             |                                  |
| <b>Gfp_H_ol_rev</b>           | GTTGACCTCCACTAGCATTACACTTCTA   | ArtA-GFP tag <i>in locus</i>     |
|                               | AGCGGCCGCTTTGTAAA              |                                  |
| <b>H_Gfp_ol_for</b>           | TGAACTTTACAAAGCGGCCGCTTAGAA    | ArtA-GFP tag <i>in locus</i>     |
|                               | GTGTAATGCTAGTGGAGGT            |                                  |
| <b>H-ArtARB-ol-rev</b>        | AGAAAAACCCATACCAACTTCCCTG      | ArtA-GFP tag <i>in locus</i>     |
|                               | GGGGGAGTTTAGGGAAA              |                                  |
| <b>ArtARB_hph_ol_for</b>      | ATGCTCTTCCCTAAACTCCCCCAGG      | ArtA-GFP tag <i>in locus</i>     |
| <b>r</b>                      | GAAGTGTTGGTATGGGTT             |                                  |
| <b>ArtARB_pjet_ol_rev</b>     | ATTGTAGGAGATCTTCTAGAAAGATCA    | ArtA-GFP tag <i>in locus</i>     |
| <b>v</b>                      | GTATCACCAATTCTCATCTG           |                                  |
| <b>ArtBend_pJet_ol_for</b>    | GATGGCTCGAGTTTTTCAGCAAGATCG    | ArtB-mCherry tag <i>in locus</i> |
| <b>or</b>                     | CGATATGGAGCGATTGTA             |                                  |
| <b>ArtBend_mCherry_ol_rev</b> | tacttacCTCGCCCTTGCTTACCATTATCT | ArtB-mCherry tag <i>in locus</i> |
|                               | TGGCCTCAACTTGCC                |                                  |
| <b>mCherry_artBend_ol_for</b> | CACGGGGCAAGTTGAGGCCAAGATAA     | ArtB-mCherry tag <i>in locus</i> |
|                               | TGGTAAGCAAGGGCGAG              |                                  |
| <b>mCherry_H_ol_rev</b>       | GTTGACCTCCACTAGCATTACACTTtaT   | ArtB-mCherry tag <i>in locus</i> |
|                               | TTGTAGAGTTCATCCATTC            |                                  |
| <b>H_mCherry_ol_for</b>       | TGGAATGGATGAACTCTACAAataaAAG   | ArtB-mCherry tag <i>in locus</i> |
|                               | TGTAATGCTAGTGGAGGT             |                                  |
| <b>H_artBRB_ol_rev</b>        | CAGTACAAGATATCGGCAAAACACATG    | ArtB-mCherry tag <i>in locus</i> |
|                               | GGGGGAGTTTAGGGAAA              |                                  |
| <b>ArtBRB_H_ol_for</b>        | ATGCTCTTCCCTAAACTCCCCCATG      | ArtB-mCherry tag <i>in locus</i> |
|                               | TGTTTTGCCGATATCTTGTA           |                                  |



---

ArtBRB\_pJet\_ol\_rev ATTGTAGGAGATCTTCTAGAAAGATAC ArtB-mCherry tag *in locus*  
GAGACTACACGAACAGC

---

## Reference

- 1 Youssar, L. *et al.* Intercellular communication is required for trap formation in the nematode-trapping fungus *Duddingtonia flagrans*. *PLoS Genet* **15**, e1008029 (2019).
